# Supplementary material for: Estimation of geostrophic current in the Red Sea based on sea level anomalies derived from extended satellite altimetry data
Source: Copernicus journal article supplement (doi:10.5194/os-15-477-2019), 2019-05-08
Supplement: Supplementary file 1 [file os-15-477-2019-supplement.pdf]

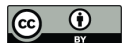

## *Supplement of*

# **Estimation of geostrophic current in the Red Sea based on sea level anomalies derived from extended satellite altimetry data**

**Ahmed Mohammed Taqi et al.**

*Correspondence to:* Ahmed Mohammed Taqi (ataqi@stu.kau.edu.sa)

The copyright of individual parts of the supplement might differ from the CC BY 4.0 License.

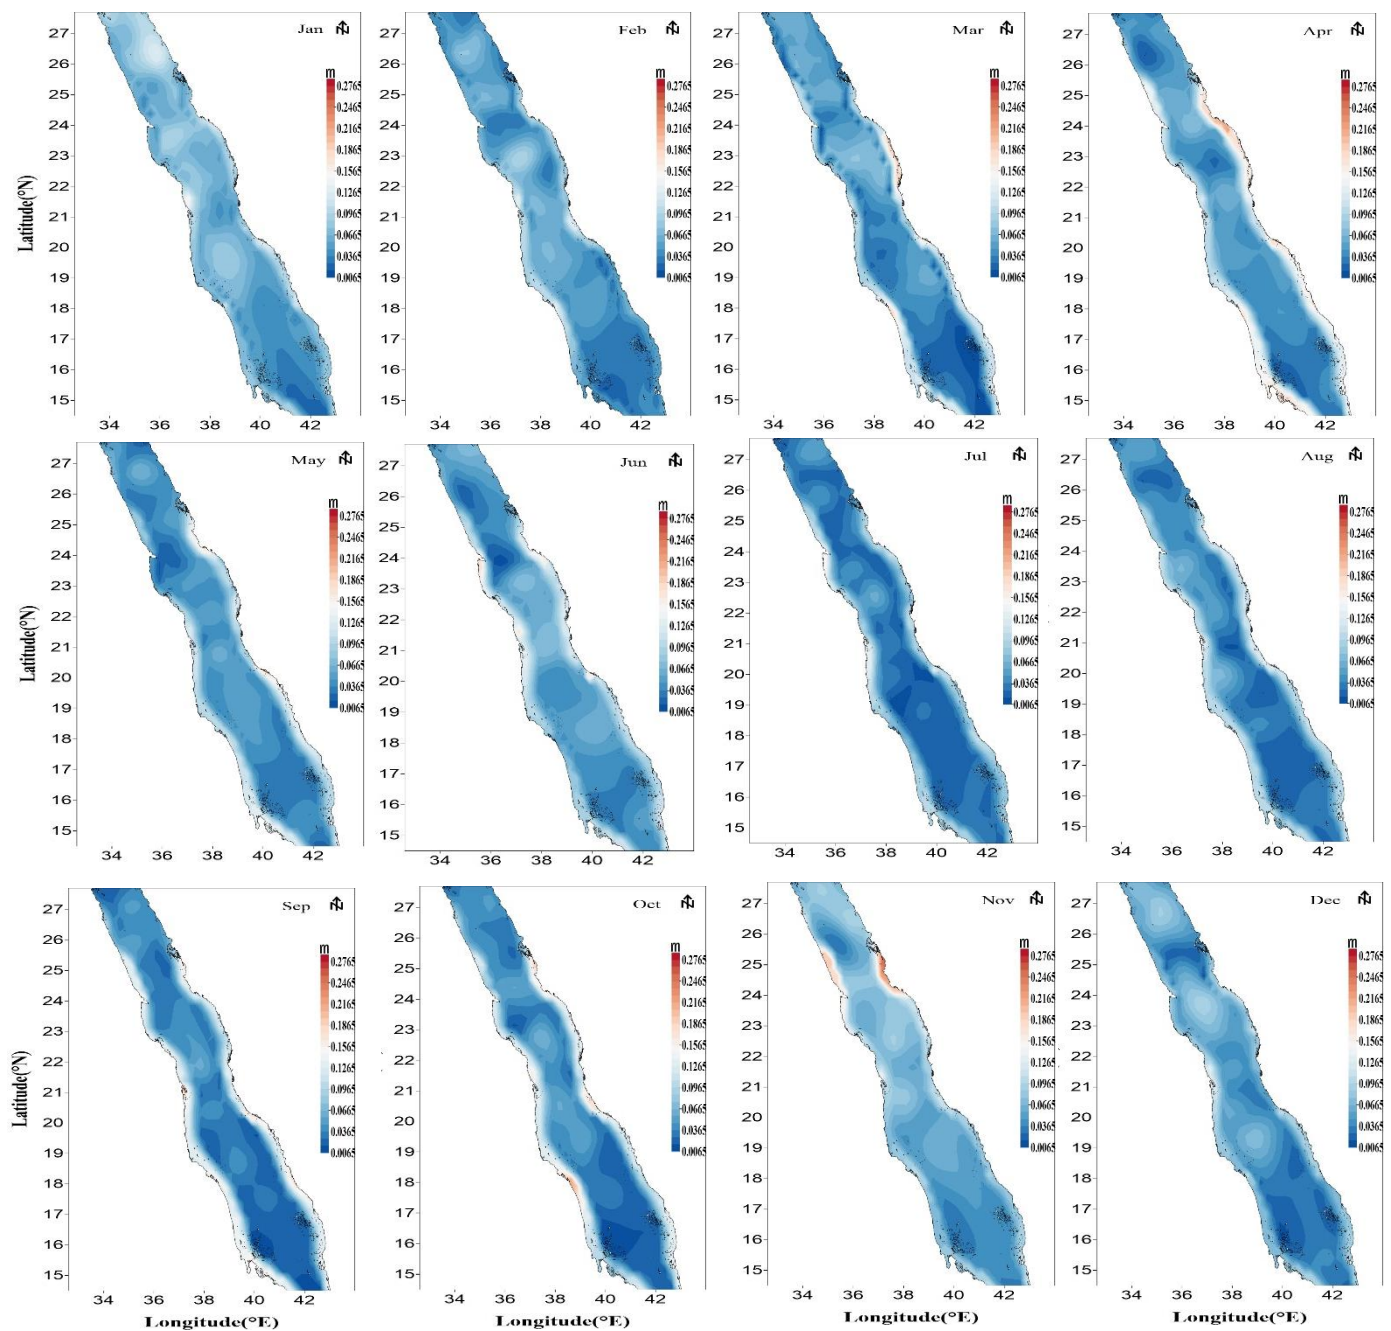

Figure S1 Standard deviation of each month from different year from the monthly climatology

Table S1 Minimum, maximum and mean standard deviation of each month from different year from the monthly climatology

|      | jan   | feb   | mar   | apr   | may   | jun   | jul   | aug   | sep   | oct   | Nov   | Dec   |
|------|-------|-------|-------|-------|-------|-------|-------|-------|-------|-------|-------|-------|
| min  | 0.016 | 0.011 | 0.008 | 0.016 | 0.014 | 0.011 | 0.010 | 0.013 | 0.013 | 0.007 | 0.018 | 0.009 |
| max  | 0.160 | 0.137 | 0.192 | 0.232 | 0.169 | 0.178 | 0.149 | 0.131 | 0.186 | 0.209 | 0.241 | 0.135 |
| mean | 0.064 | 0.050 | 0.054 | 0.067 | 0.056 | 0.061 | 0.044 | 0.050 | 0.056 | 0.057 | 0.070 | 0.052 |
